# Supplementary material for: Adsorption of bovine serum albumin on superparamagnetic composite microspheres with a Fe3O4/SiO2 core and mesoporous SiO2 shell
Source: Royal Society of Chemistry journal article supplement (doi:10.1039/c5ra21773c), 2015-01-01
Supplement: c5ra21773c1.pdf [file c5ra21773c1.pdf]

## **Adsorption of bovine serum albumin on superparamagnetic composite microspheres with Fe<sub>3</sub>O<sub>4</sub>/SiO<sub>2</sub> core and mesoporous SiO<sub>2</sub> shell**

**Xuemei Hou,<sup>a</sup> Xu Hongbo,<sup>b</sup> Lei Pan,<sup>a</sup> Yanlong Tian,<sup>b</sup> Xiang Zhang,<sup>b</sup> Lihua Ma,<sup>a</sup> Yao Li<sup>b</sup> and Jiupeng Zhao<sup>\*a</sup>**

<sup>a</sup> *School of Chemical Engineering and Technology, Harbin Institute of Technology, Harbin, PR China Fax: +86 0451 86403767; Tel: +86 0451 86403767; E-mail: [jiupengzhao-126.com](mailto:jiupengzhao-126.com)*

<sup>b</sup> *Center for Composite Materials, Harbin Institute of Technology, Harbin, PR China.*

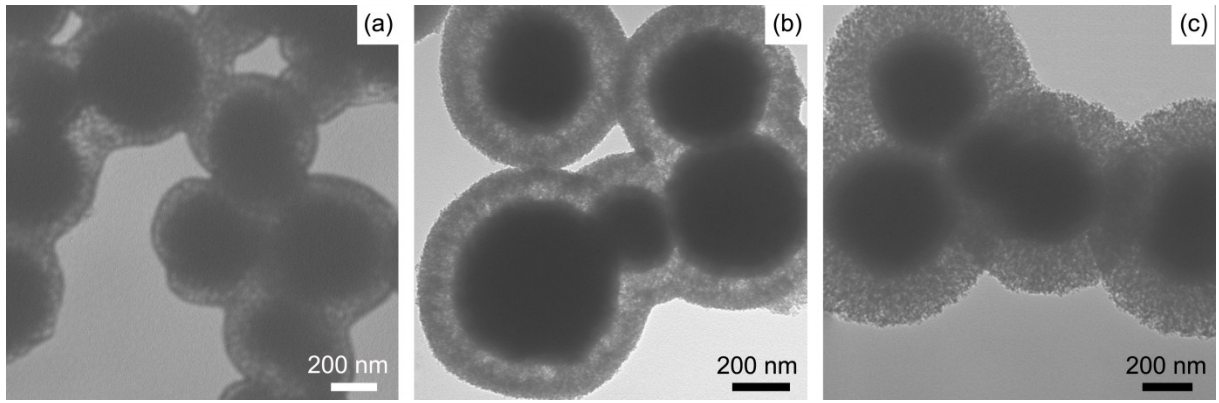

Fig. S1. TEM micrographs of  $\text{Fe}_3\text{O}_4/\text{SiO}_2/\text{mSiO}_2$  nanoparticles with different TEOS amounts: (a) 2, (b) 3, (c) 4 mL.

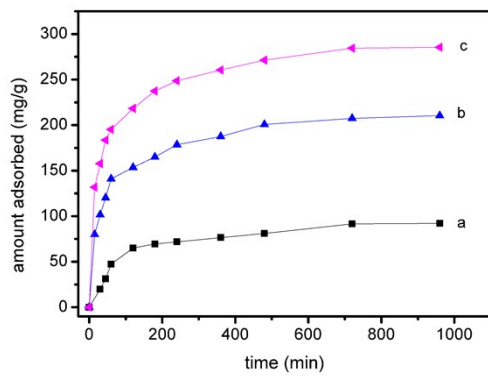

Fig. S2. BSA adsorption on  $\text{Fe}_3\text{O}_4/\text{SiO}_2/\text{mSiO}_2$  nanoparticles of different TEOS amounts: (a) 2, (b) 3, (c) 4 mL.
